# Supplementary material for: Chiral Separation of Vildagliptin by Capillary Electrophoresis—The Study of Enantiomeric Complexation
Source: MDPI journal article supplement (doi:10.3390/sym16010017), 2023-12-22
Supplement: s1 [file s1]

## Article

# Chiral Separation of Vildagliptin by Capillary Electrophoresis—The Study of Enantiomeric Complexation

Lajos Attila Papp <sup>1</sup>, Gabriel Hancu <sup>1,\*</sup>, Zoltán István Szabó <sup>2,3</sup>, Blanka Székely-Szentmiklósi <sup>1</sup>, Tamás Gáti <sup>4</sup>, Béla Fiser <sup>5,6,7</sup>, Márta Kraszni <sup>8</sup> and Gergő Tóth <sup>8</sup>

<sup>1</sup> Department of Pharmaceutical Chemistry, Faculty of Pharmacy, “George Emil Palade” University of Medicine, Pharmacy, Science and Technology Târgu Mureș, 540120 Târgu Mureș, Romania; lajos.papp@umfst.ro (L.A.P.); blanka.szekely-szentmiklosi@umfst.ro (B.S.-S.)

<sup>2</sup> Department of Drugs Industry and Pharmaceutical Management, Faculty of Pharmacy, “George Emil Palade” University of Medicine, Pharmacy, Science and Technology Târgu Mureș, 540120 Târgu Mureș, Romania; zoltan.szabo@umfst.ro

<sup>3</sup> Sz-Imfidum, Ltd., Str. Lunga nr. 504, 525401 Târgu Mureș, Romania

<sup>4</sup> Servier Research Institute of Medicinal Chemistry (SRIMC), H-1031 Budapest, Hungary; tamas.gati@servier.com

<sup>5</sup> Higher Education and Industrial Cooperation Centre, University of Miskolc, H-3515 Miskolc, Hungary; bela.fiser@uni-miskolc.hu

<sup>6</sup> Department of Biology and Chemistry, Ferenc Rakoczi II Transcarpathian Hungarian College of Higher Education, Transcarpathia, 90200 Beregszász, Ukraine

<sup>7</sup> Department of Physical Chemistry, Faculty of Chemistry, University of Lodz, 90-149 Łódź, Poland

<sup>8</sup> Department of Pharmaceutical Chemistry, Semmelweis University, 1092 Budapest, Hungary; kraszni.marta@semmelweis.hu (M.K.); toth.gergo@pharma.semmelweis-univ.hu (G.T.)

\* Correspondence: gabriel.hancu@umfst.ro

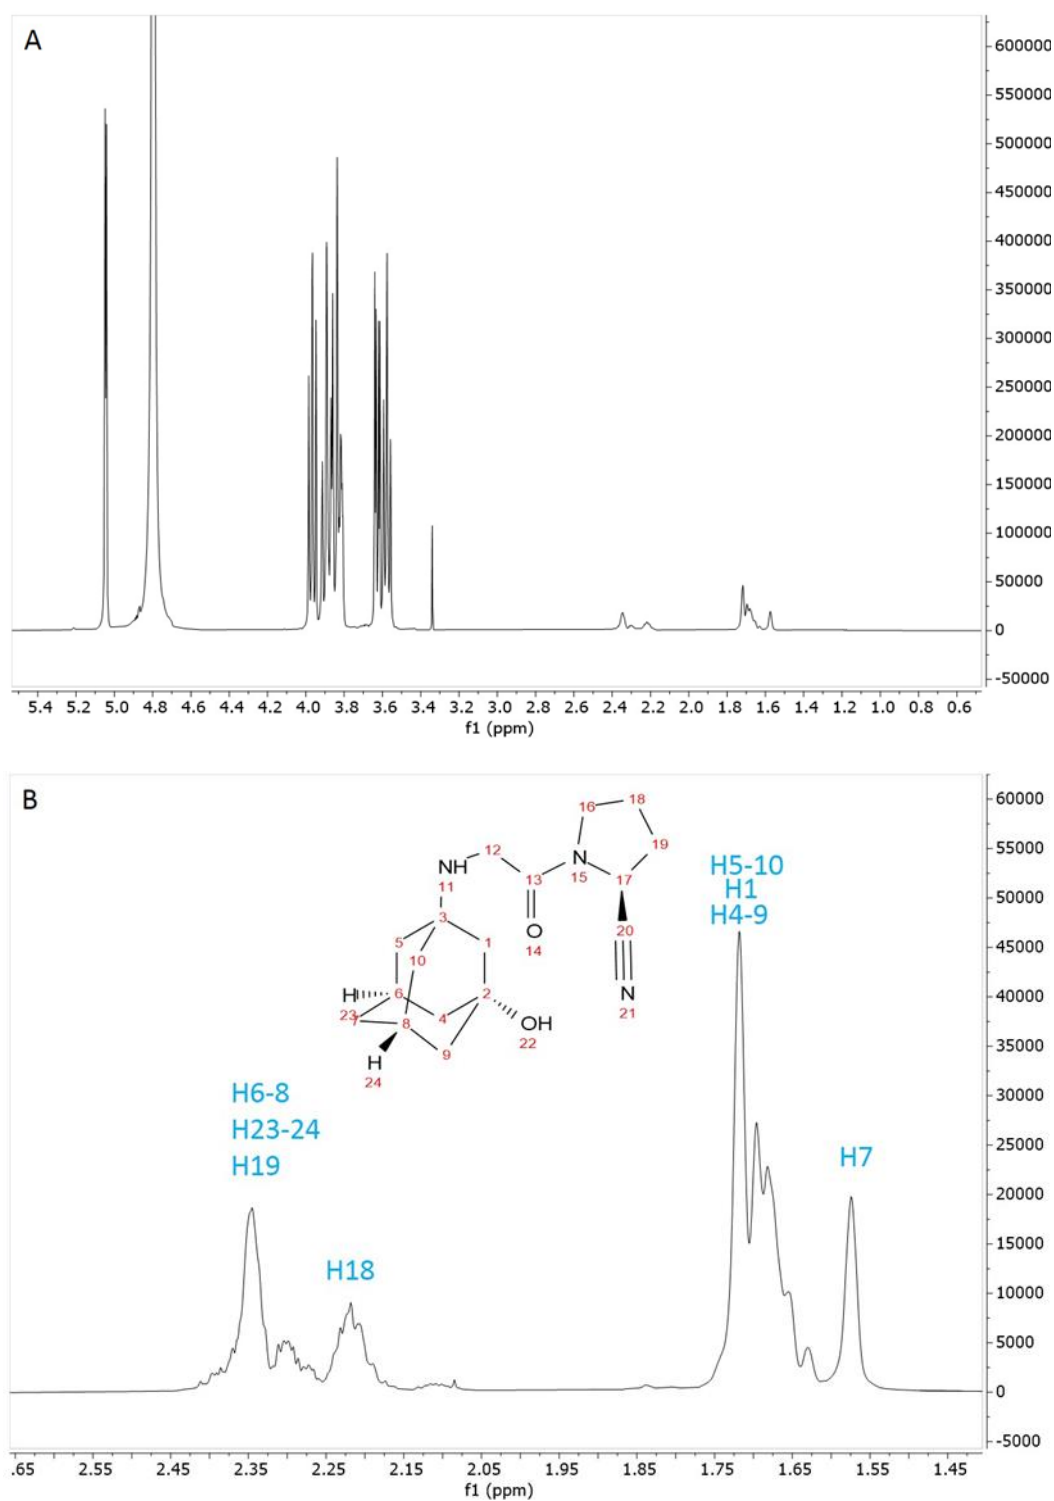

**Figure S1.**  $^1\text{H}$  NMR (500 MHz) spectrum of *S,R*-VIL 2:1 mixture with  $\alpha$ -CD in 1:3 ratio in  $\text{D}_2\text{O}$ . **A**, whole spectrum **B**, enlarged part of the aliphatic region showing several VIL signals

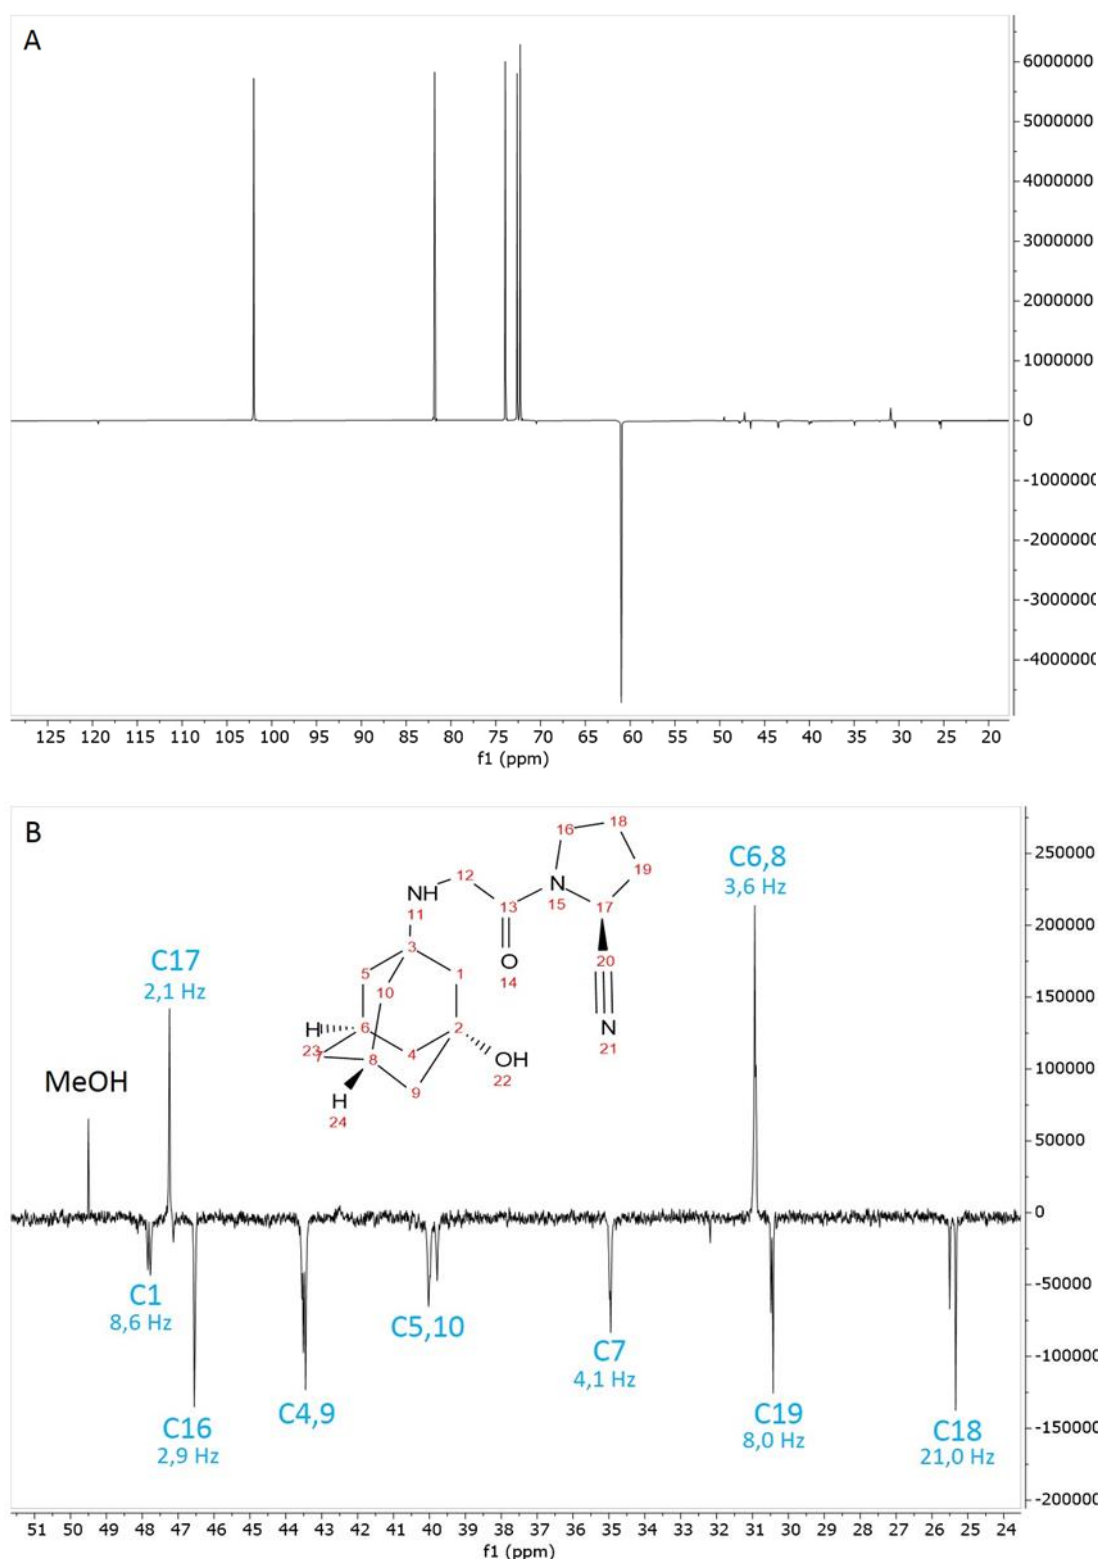

**Figure S2.**  $^{13}\text{C}$  NMR (125 MHz, deptqsp) spectrum of S,R-VIL 2:1 mixture with  $\alpha$ -CD in 1:3 ratio in  $\text{D}_2\text{O}$ . A, whole spectrum B, enlarged part of the aliphatic region showing several VIL signals with frequency differences between S and R enantiomers' signals.

**Table S1.** Experimental plan and results obtained for the 2<sup>5-2</sup> type fractional factorial design

| Standard order | Run order | Factors |                |               |            |              | Responses |          |
|----------------|-----------|---------|----------------|---------------|------------|--------------|-----------|----------|
|                |           | BGE pH  | BGE conc. (mM) | CD conc. (mM) | Temp. (°C) | Voltage (kV) | <i>R</i>  | <i>t</i> |
| 6              | 1         | 5.5     | 25             | 50            | 15         | 25           | 0.79      | 3.4      |
| 9              | 2         | 5       | 50             | 40            | 20         | 20           | 0.78      | 3.78     |
| 5              | 3         | 4.5     | 25             | 50            | 25         | 15           | 0.68      | 4.35     |
| 7              | 4         | 4.5     | 75             | 50            | 15         | 15           | 2.23      | 13.84    |
| 1              | 5         | 4.5     | 25             | 30            | 25         | 25           | 0.39      | 2.25     |
| 10             | 6         | 5       | 50             | 40            | 20         | 20           | 0.82      | 3.73     |
| 4              | 7         | 5.5     | 75             | 30            | 25         | 15           | 1.14      | 8.78     |
| 2              | 8         | 5.5     | 25             | 30            | 15         | 15           | 0.56      | 4.94     |
| 8              | 9         | 5.5     | 75             | 50            | 25         | 25           | 0.87      | 2.37     |
| 3              | 10        | 4.5     | 75             | 30            | 15         | 25           | 1.00      | 3.53     |
| 11             | 11        | 5       | 50             | 40            | 20         | 20           | 0.81      | 3.78     |

**Table S2.** Experimental plan and results obtained for the FCCD

| Standard order | Run order | Factors        |            |              | Responses |          |
|----------------|-----------|----------------|------------|--------------|-----------|----------|
|                |           | BGE conc. (mM) | Temp. (°C) | Voltage (kV) | <i>R</i>  | <i>t</i> |
| 16             | 1         | 75             | 20         | 20           | 1.57      | 5.60     |
| 20             | 2         | 75             | 20         | 20           | 1.51      | 5.50     |
| 15             | 3         | 75             | 20         | 20           | 1.48      | 5.44     |
| 17             | 4         | 75             | 20         | 20           | 1.52      | 5.38     |
| 11             | 5         | 75             | 15         | 20           | 1.82      | 5.77     |
| 13             | 6         | 75             | 20         | 15           | 1.62      | 8.29     |
| 19             | 7         | 75             | 20         | 20           | 1.42      | 5.29     |
| 1              | 8         | 60             | 15         | 15           | 2.05      | 9.19     |
| 14             | 9         | 75             | 20         | 25           | 0.90      | 3.32     |
| 5              | 10        | 60             | 15         | 25           | 1.56      | 4.20     |
| 8              | 11        | 90             | 25         | 25           | 0.71      | 2.76     |
| 6              | 12        | 90             | 15         | 25           | 1.02      | 3.18     |
| 10             | 13        | 90             | 20         | 20           | 1.41      | 5.14     |
| 12             | 14        | 75             | 25         | 20           | 1.12      | 4.35     |
| 3              | 15        | 60             | 25         | 15           | 1.23      | 6.50     |
| 9              | 16        | 60             | 20         | 20           | 1.37      | 5.04     |
| 2              | 17        | 90             | 15         | 15           | 1.95      | 10.08    |
| 18             | 18        | 75             | 20         | 20           | 1.44      | 5.09     |
| 4              | 19        | 90             | 25         | 15           | 1.35      | 7.12     |
| 7              | 20        | 60             | 25         | 25           | 0.91      | 2.79     |
